# Supplementary material for: A Maternal System Initiating the Zygotic Developmental Program through Combinatorial Repression in the Ascidian Embryo
Source: PubMed Central journal article supplement (PMC4859511; doi:10.1371/journal.pgen.1006045), 2016-05-06

A

-219 (KhC2:4475337)  
 ↓  
 gttgtttaacagcaattaagccgcatatagataactgtgcgactggctcgtctgccatTTTTAGATA  
 μTcf7(a): cccg  
 gccttcccagtgcttctgttctcgagattacgatcacaagcgtaagacgtcaa **gttcaccgacaaaga**  
 μTcf7(b): ggga  
**taaga**atcgcgacccacacaagtcactgcccgccttctctcg **tttctcgtcgtacacaaaagcagcgg**  
 μTcf7(c): ccct  
 gaatcttgactcggagCATCACTCTTGAATCGCCACTCAGC  
 -33  
 Fgf9/16/20 (KH. C2.125.v1.A.nonSL4-1)

B

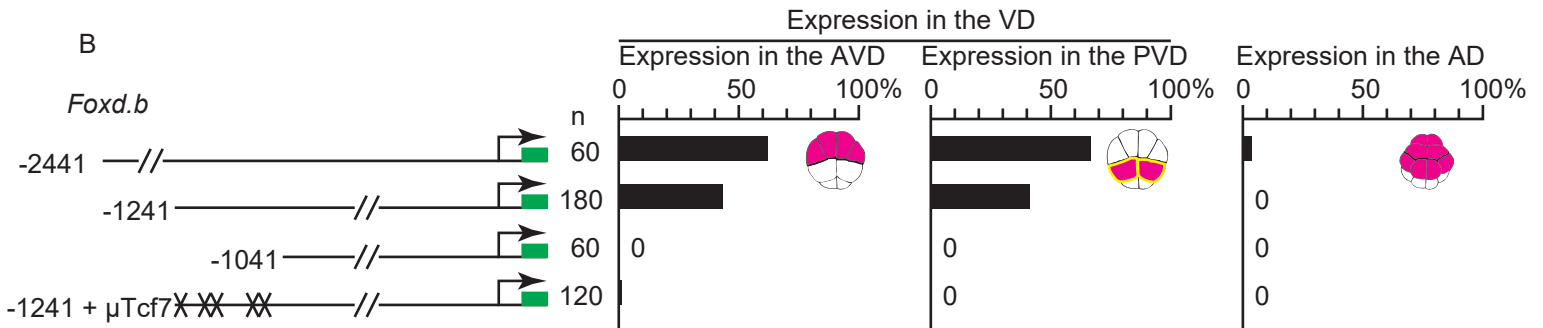

C

-1241 (KhC8:2621713)  
 ↓  
 tttgtttactTTTTTTTACTTTGTTTATGTTAAGTAAAGTTAATTTTCATTAAGATGTTAGTTCGACT  
 μTcf7: ccca  
 μTcf7: cc  
 μTcf7: ccca  
 μTcf7: ccca  
 μTcf7: ccca  
 -1042 (KhC8:2621714)

D

Foxd.b TTTGTTTACTTTTTTACTTTGTTTATGTTAAGTAAAGTTAATTTTCATTAAGATGTTAGTTCGACT  
 Foxd.a GTGGGAGTATGTTCTTACTTTGTTTATGTTAATTTAAATTTATAATTTATCAAAGATGTTAGTTCGACT  
 \* \* \* \* \*  
 Foxd.b TTAATCGTAGCTT--AGTTTGACTGATGTCGCGAGTGATTAGGCGATAAGAAGGCGAGAAATATCATC  
 Foxd.a TTAATCGTAGCTTATAGTTTGATTGATGTCGCGTGCATTAAAGCGATAAGAAGGCGAGAAATATCATC  
 \* \* \* \* \*  
 Foxd.b GATGTTTGTTCGGATATTTGGCGCGTGTGTTGGCGTTTGAAGAGGCGAGTTCGAGTTCGCGAGTC  
 Foxd.a GATGTTTGTTCGGATATTTGGCGCGTGTGTTGGCGTTTGAAGAGGCGAGTTCGAGTTCGCGAGTC  
 \* \* \* \* \*

E

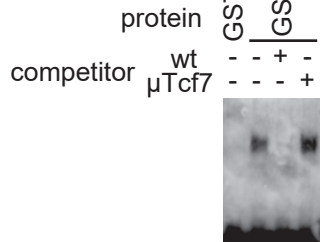

F

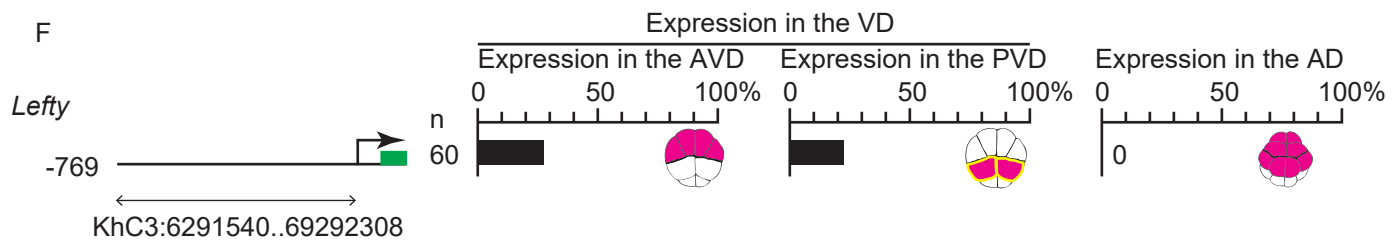

G

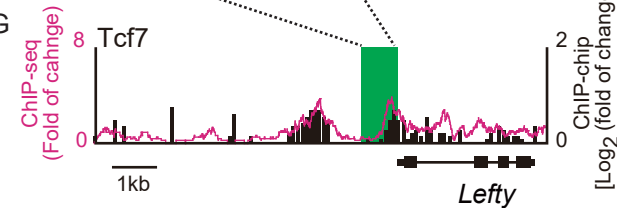

Supplement: pgen.1006045.s005.pdf [file pgen.1006045.s005.pdf]
