# Supplementary material for: A Maternal System Initiating the Zygotic Developmental Program through Combinatorial Repression in the Ascidian Embryo
Source: PubMed Central journal article supplement (PMC4859511; doi:10.1371/journal.pgen.1006045), 2016-05-06
Supplement: pgen.1006045.s006.pdf [file pgen.1006045.s006.pdf]

A

-198 (KhS654:27125)  
 -189 (KhS654:27116)  
 μB: *ttgagtaacgcatac*  
 μA: *tatatattgtgcatgga*  
 μC: *gtgtaggctgatgaa*  
 μD: *gtgtaggctgatgaa*  
 μE: *gtgtaggctgatgaa*  
 μF: *gtgtaggctgatgaa*  
 μTcf7: *tgggga*  
 μTcf7: *acccc*  
 -147  
 ttatcaaacc<sup>aa</sup>cgcgccacatgcaagacggtatg<sup>cgt</sup>cacactgag<sup>gtttt</sup>ggagtgttctgcatg<sup>cg</sup>  
 ctacacgaatcagcag<sup>g</sup>agagttcggag<sup>tctt</sup>atcaggaagcag<sup>ttg</sup>t<sup>c</sup>cctgttaatgactc<sup>gt</sup>  
 aagat<sup>caaag</sup>t<sup>gacat</sup>c<sup>gaaa</sup>acgag<sup>t</sup>c<sup>t</sup>cgctata<sup>aaa</sup>atg<sup>g</sup>g<sup>tt</sup>tag<sup>ttt</sup>acag<sup>t</sup>ac<sup>ctc</sup>ATTCCG  
 Tbx6.b (KH.S654.3.v1.A.nonSL2-1)

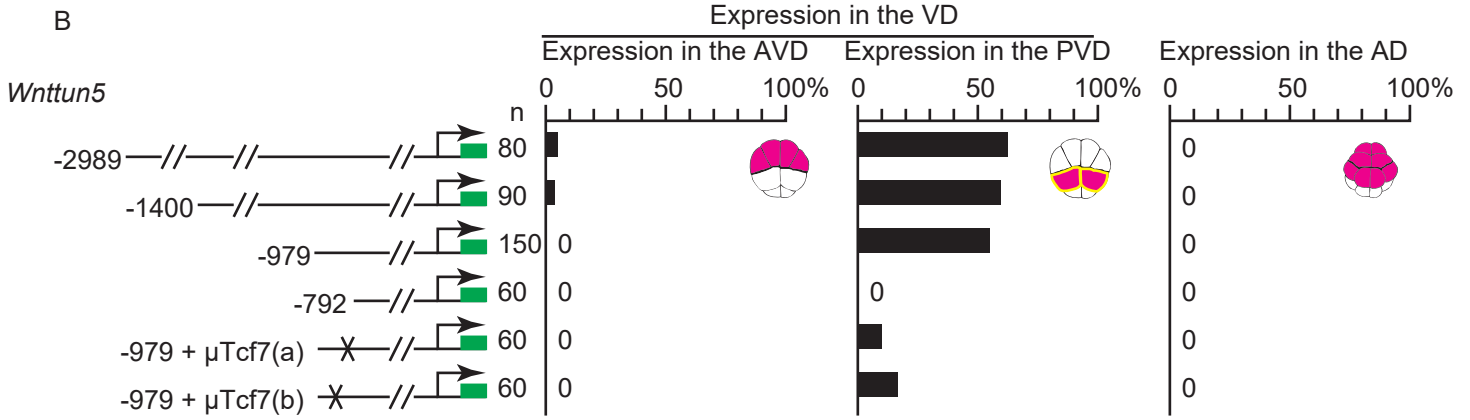

C Wnttun5: -979

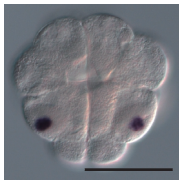

D Wnttun5: -979 + μTcf7(b)

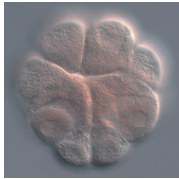

E -994 (KhC9:4425410)  
 -979 (KhC9:4425395)  
 μTcf7(b): *ccca*  
 μTcf7(a): *accct*  
 ctgcagcaagat<sup>cgtcgtcgtttg</sup>atc<sup>gctg</sup>ccgtaattacaggtcca  
 cacg<sup>c</sup>gagcagc<sup>t</sup>tgttt<sup>gttt</sup>atc<sup>t</sup>ctg<sup>catt</sup>tgcgagctacagggg  
 ctttaattg<sup>ccc</sup>g<sup>cc</sup>gag<sup>ttt</sup>gtc<sup>gg</sup>cag<sup>ttt</sup>gt<sup>c</sup>ggcag<sup>ttt</sup>gttatttcaagg<sup>cc</sup>  
 gatctccgcatacggggatg<sup>c</sup>gcaagc<sup>gact</sup>gatctatttgataattg  
 g<sup>c</sup>gg<sup>ttt</sup>c<sup>ct</sup>cg<sup>ccc</sup>ctag<sup>t</sup>g<sup>c</sup>tgg<sup>g</sup>caggg<sup>gt</sup>t<sup>g</sup>gaatc<sup>g</sup>agcaatt  
 acgattg<sup>c</sup>gatc<sup>g</sup>cc<sup>g</sup>cc<sup>g</sup>accac<sup>ct</sup>attgggag<sup>g</sup>ccgagactc<sup>g</sup>tcc  
 g<sup>g</sup>gtatatta  
 -863  
 -860 -853  
 -793  
 -735  
 -697

F

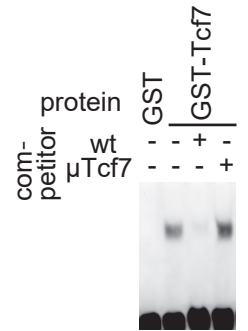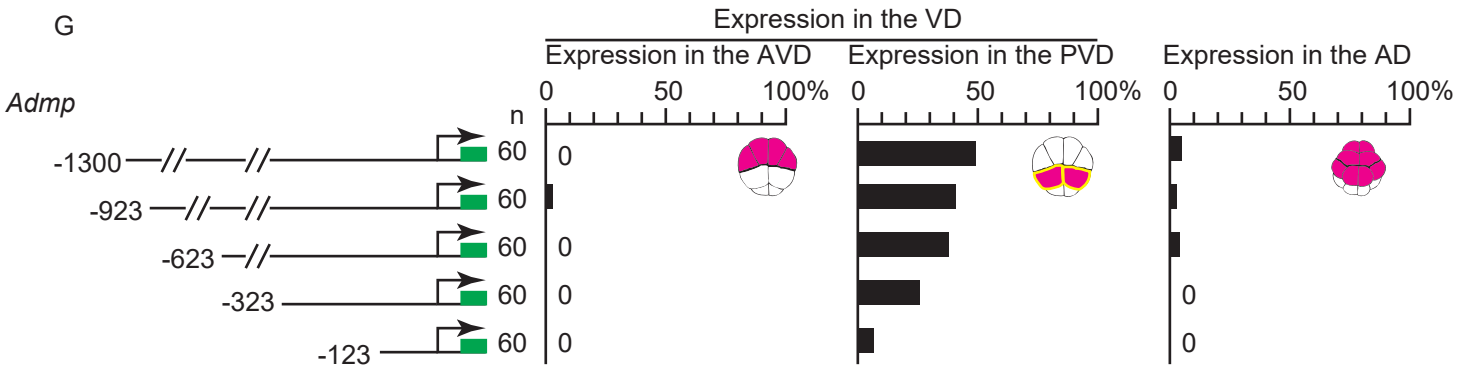

H -323 (KhC2:1982640)

tcttcgagaaaagtgcacttaccgattcaacttttcgatcgcattttcgcagagctttctgagtgca  
 ggtgatggctgactggtttggtttttgaggaccctagagtgcttaccaccgcaacactgataac<sup>g</sup>t  
 gttatctacggtttacggacaactgctg<sup>c</sup>gctg<sup>c</sup>tctctcgg<sup>t</sup>ctacg<sup>c</sup>t<sup>c</sup>g<sup>t</sup>c<sup>g</sup>tatg<sup>ttt</sup>g<sup>c</sup>  
 gaattttcgtacatccggagatcaa<sup>at</sup>atcagcgg<sup>gt</sup>gatt<sup>g</sup>aatgatcgg<sup>t</sup>ccgatt<sup>t</sup>aagt<sup>g</sup>acag  
 gacttaccgacagcacagtagataagcggagcagaagaatttggacactcACATTGA  
 Admp (KH.C2.421.v1.A.nonSL4-1)
