# Supplementary material for: A Maternal System Initiating the Zygotic Developmental Program through Combinatorial Repression in the Ascidian Embryo
Source: PubMed Central journal article supplement (PMC4859511; doi:10.1371/journal.pgen.1006045), 2016-05-06

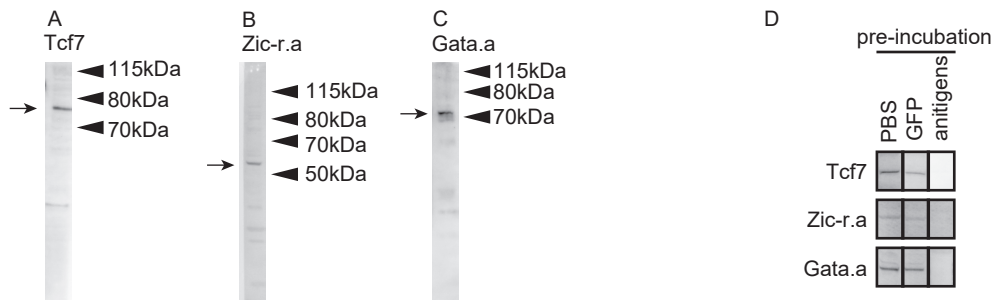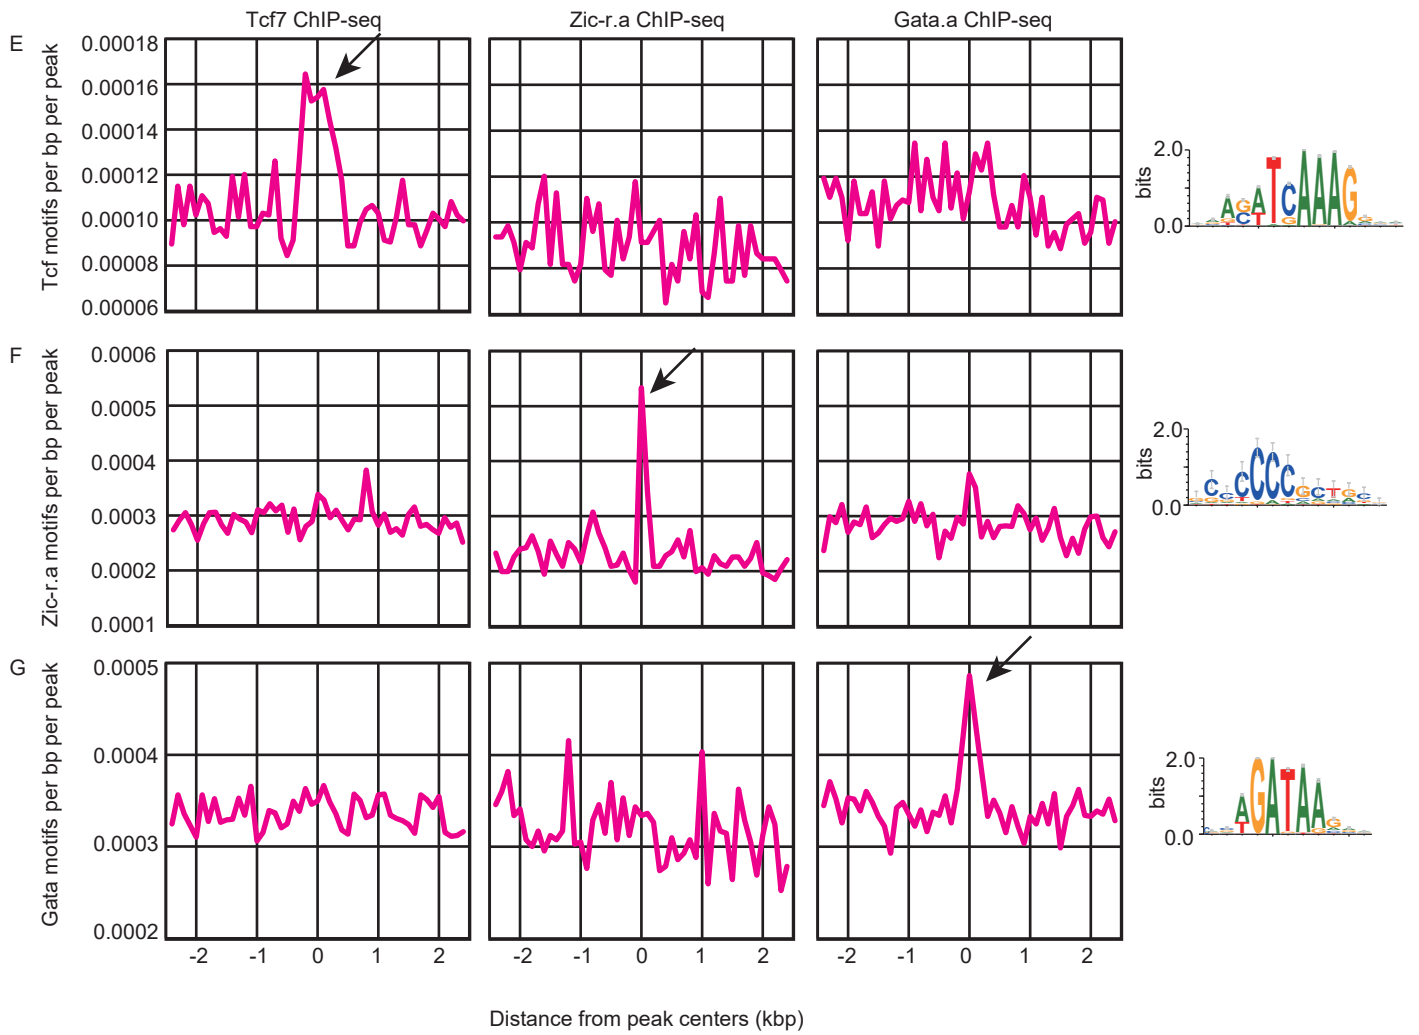

Supplement: pgen.1006045.s012.pdf [file pgen.1006045.s012.pdf]
